# Supplementary material for: Networked Output Feedback Control for a Class of Uncertain Nonlinear Time-Delay Systems
Source: Hindawi journal article supplement (doi:10.1155/2019/4706846), 2019-12-20
Supplement: f1 [file 4706846.f1.pdf]

```
%%%%%%%%%%main program%%%%%%%%%%
```

```
clear all;
global h h1 j L t0 u dstate a1 a2 b1 b2 v yr e10;
b1=0.3072;
b2=1.8560;
b3=3.92;
b4=3.4;
L=6;
```

```
x0=[0.2 0.4 0.8 1 0 0 0 0];
u=0;
dstate=0;
h=0.01;
h1=0.001;
tfinal=5;
traspan=0:h:tfinal;
N=length(traspan)-1;
e10=x0(1);
j=1;
t0=0;
```

```
for i=1:1:N
    timeset=t0:h1:i*h;
    options=odeset('RelTol',1e-6,'AbsTol',[1e-7 1e-7 1e-7 1e-7 1e-7 1e-7 1e-7 1e-7]);
    [t,xx]=ode45('state',timeset,x0,options);

    x(1+(i-1)*10:10+(i-1)*10+1,:)=xx;
    %x(1)=x(10+(i-1)*10+1,1);
    % dstate(1+(i-1)*10:10+(i-1)*10+1)=x((i-1)*10+1,1);
    % dstate=x(1);
    x0=xx(11,:);

    t0=i*h;
    v(1+(i-1)*10:10+(i-1)*10+1)=-L^4*b1*x((i-1)*10+1,5)-L^3*b2*x((i-1)*10+1,6)-L^2*b3*x((i-1)*10+1,7)-L*b4*x((i-1)*10+1,8);
    %L^4*b1*sin((i-1)*0.01+0.001
    u=v(10+(i-1)*10+1);
    dstate=x((i-1)*10+1,1);
    e10=xx(11,1);
    j=j+1;
end

% tt=0:0.001:tfinal;
% plot(tt,x(:,1),'-',tt,sin(tt));
% legend('Response of x_1(t)', 'reference signal')
%
% figure
% tt=0:0.001:tfinal;
% plot(tt,v);
% legend('Sampled-data Controller')
```

```

% tt=0:0.001:tfinal;
% plot(tt,x(:,5),tt,x(:,6),tt,x(:,7),tt,x(:,8));
% legend({'\hat{x}_1$', '\hat{x}_2$', '\hat{x}_3$', '\hat{x}_4$'}, 'Interpreter', 'latex');
tt=0:0.001:tfinal;
plot(tt,x(:,1),tt,x(:,2),tt,x(:,3),tt,x(:,4));
legend({'${x}_1$', '${x}_2$', '${x}_3$', '${x}_4$'}, 'Interpreter', 'latex');

```

```

%%%%%%%%function%%%%%%%%%%%%%%

```

```
function y=state(t,x)
```

```
global x1 x2 x3 x4 x1hat x2hat x3hat x4hat u L a1 a2 a3 a4 e10 dstate
```

```
x1=x(1);
```

```
x2=x(2);
```

```
x3=x(3);
```

```
x4=x(4);
```

```
x1hat=x(5);
```

```
x2hat=x(6);
```

```
x3hat=x(7);
```

```
x4hat=x(8);
```

```
e1=e10-x1hat;
```

```
a1=3.4;
```

```
a2=3.92;
```

```
a3=1.8560;
```

```
a4=0.3072;
```

```
y(1)=x(2);
```

```
y(2)=x(3)-0.1*sin(t)*x(2)-0.1*dstate;
```

```
y(3)=x(4);
```

```
y(4)=u-0.1*dstate-0.1*x(3)-0.1*cos(t)*x(4);
```

```
y(5)=x2hat+L*a1*e1+cos(t);
```

```
y(6)=x3hat+L^2*a2*e1;
```

```
y(7)=x4hat+L^3*a3*e1;
```

```
y(8)=u+L^4*a4*e1;
```

```
y=[y(1);y(2);y(3);y(4);y(5);y(6);y(7);y(8)];
```
